# Supplementary material
Source: Springer Nature journal article supplement (https://www.springermedizin.de/resource/supplementary/12883_2013_1143_MOESM2_ESM.pdf/9456404)

**A**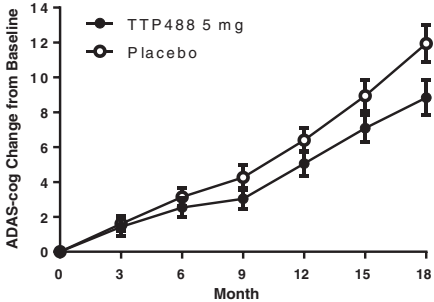**B**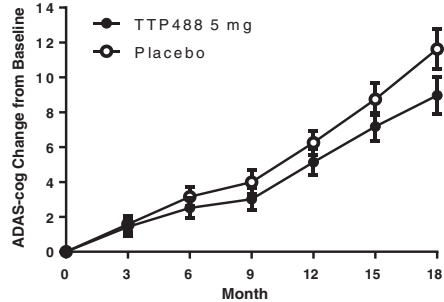

Supplement: MOESM2 [file 9456404]
